# Supplementary material
Source: PubMed Central journal article supplement (PMC1352163)
Supplement: NIHMS4257-supplement-SI_guide.pdf [file NIHMS4257-supplement-SI_guide.pdf]

## SIGuide ms 2004-09-24100A

Supplemental information

Supplemental method S1: Materials, Methods and Analysis, pdf file , 321kb

Supplemental data S2: mouse mutant neck phenotypes, pdf file, 760kb

Supplemental method S3: New methodology for determining neck/shoulder homologies.  
refs.S1-S3. , pdf file 37kb
