# Supplementary material
Source: PubMed Central journal article supplement (PMC1352163)
Supplement: NIHMS4257-supplement-SI_methods_S2.pdf [file NIHMS4257-supplement-SI_methods_S2.pdf]

## Appendix S3: New methodology for determining shoulder girdle homologies

### Comparative scope

Detection of conserved muscle pattern constraints in the neck region requires high-resolution long-term lineage mapping in a species with a neck musculature sufficiently generalized for gnathostomes. This is difficult to do. The chick as the only vertebrate in which long-term lineage labeling (by chick-quail chimeras) was feasible so far<sup>2</sup> is not informative: the ancestral jawed vertebrate neck musculature was dismantled during the evolution of the avian flying apparatus and a re-configured neck region with unique muscle innervation patterns bars detailed comparisons beyond archosaurs<sup>5,14</sup>. The mammalian neck and shoulder region is far more conservative. This determines our choice for the mouse as a model system to study the mechanisms behind the plesiomorphic muscle pattern shared among all living gnathostomes.

Fortunately, recent advances in recombinase-mediated lineage tracing now permit experimental verification of lineage descendants for the very first time.

Following this approach we have identified the neck and shoulder region as the interface of the neural crest and mesodermal cell populations. We show that boundaries of embryonic cell populations precisely correspond to muscle attachment regions but not to ossification modes. The conservation of muscle patterns (Fig. 1) is therefore likely to be a reflection of conserved cell population boundaries. The latter appear to be far more stable than the signaling pathways that determine their (dermal-endochondral) ossification as attachment points (Fig.1). An alternative hypothesis would have to find multiple independent developmental explanations for such highly constrained muscle patterns (Fig.1). Verification of cell boundary stability and the validity of the ‘scaffold model’ will have to await further genetic fate mapping in a wider phylogenetic range of species when this becomes possible. However, our present high-resolution data set for the mouse allows us to reject the widely held competing ‘ossification model’<sup>9,7</sup>: dermal-endochondral ossification modes are not safe criteria for identifying cellular origins and homologies of neck and shoulder structures. Notably, muscle attachment patterns in the neck of mice follow the same connectivity rules that have already been observed in the cranial (hindbrain) neural crest of birds<sup>13</sup> and amphibians<sup>31</sup> and would therefore be at least a shared tetrapod character. The unity of skeletal attachment region and connective tissue origin has been demonstrated for mesoderm in the trunk and scapular blade of birds and turtles<sup>24</sup>, is therefore at least a common amniote feature. The highly conserved nature of the crest-mesoderm neck muscle scaffold across jawed vertebrates might suggest that these connectivity rules are in fact universal for gnathostomes.

### Methodology

The rather counter-intuitive ‘scaffold model’ supported by our single cell labeling perceives muscle connectivities as the basic units (as they precisely correspond to cell populations) and the skeletal structures everyone can see as subjects of change. This prompts a new heuristic strategy for establishing neck homologies in an experimentally falsifiable manner.

We first determine the connective tissue origins of the attached muscles on a given skeletal element and then infer the cellular origin of the skeletal attachment site. Muscles are either branchial (with neural crest connective tissue) or trunk/mesodermal (with somite-derived connective tissues). A muscle is branchial if it is either 1. motor-innervated by a branchial (hindbrain) nerve or 2. connected to branchial skeleton (connective tissue) or 3. connected to anterior shoulder girdle skeleton. These rules take into account the unusual structure of the hypoglossus (tongue muscle connectivity) system (rule2, Fig.6a) as well as coraco-branchial system (rule 3, Fig.4c,5a,c). Conversely, a muscle is to be considered mesodermal if 1. it is innervated by spinal nerves only or 2. attached onto the posterior margin of the shoulder girdle. Once muscle origins are determined, their respective skeletal attachment regions can be safely attributed to neural crest or mesoderm and the bone can be subdivided according to these criteria. Our ‘scaffold model’ makes precise predictions that will become testable once other informative species (such as *Amia* and sturgeon<sup>5</sup>) become accessible to genetic long-term lineage tracing. Zebrafish would not be particularly useful in this regard, as highly derived cyprinids have independently lost their cucullaris/trapezius musculature<sup>11</sup>. Depending on the phylogenetic distribution of connectivity mechanisms (which might be older than the emergence of skeleton), these criteria will permit us to disentangle strange fossil morphologies deep in the gnathostome tree that have hitherto defied analysis. These will be discussed elsewhere (TM, GK and PEA, manuscript in preparation).

## Appendix S1-S3 references

1. Gegenbaur, C. Über das Skelett der Gliedmaassen der Wirbeltiere im allgemeinen und der Hintergliedmaassen der Selachier insbesondere. *Jena Z. Naturw.* **5**, 397-447 (1870)
2. LeDouarin N. & Kalcheim, C. *The Neural Crest* (Cambridge University Press, 2nd Edition 199)
3. Shubin N, Tabin C & Carroll S. Fossils, genes and the evolution of animal limbs. *Nature*. Aug 14;388(6643):639-48 (1997)
4. Lumsden A. , Sprawson, N. & Graham, A. Segmental origin and migration of neural crest cells in the hindbrain region of the chick embryo. *Development* **113**, 1281-1291(1991).
5. Saunders, J.W.J. The proximo-distal sequence of origin of the parts of the chick wing and the role of the ectoderm. *J. Exp. Zool.* **108**, 363–403 (1948).
6. Smith MM & Hall B.K. Development and evolutionary origins of vertebrate skeletogenic and odontogenic tissues. *Biol. Rev.* **65**, 277–373 (1990)
7. M. M. Smith & Hall,B.K. A developmental model for evolution of the vertebrate exoskeleton and teeth: The role of cranial and trunk neural crest. In: M. K. Hecht, R. J. MacIntyre and M. T. Clegg, Editors, *Evolutionary Biology, Volume 27*, Plenum Press, pp. 387–448 New York (1993)
8. Couly, G.F., Coltey, P.M. & LeDouarin, N.M. The triple origin of skull in higher vertebrates: a study in quail-chick chimeras. *Development* **114**, 1-15 (1993).
9. Jiang X., Iseki S., Maxson R.E., Sucov H.M. and Morriss-Kay G.M.: Tissue origins and interactions in the mammalian skull vault. *Dev. Biol.*, 241, 106-116, 2002.
10. Edgeworth, F. H. *The cranial muscles of vertebrates* (Cambridge University Press, 1935)
11. Winterbottom R. A descriptive synonymy of the striated muscles of the teleostei. *Proc. Acad. Nat. Scil, Philadelphia* 125:225-317 (1974)
12. Koentges, G. & Lumsden, A.G.S. Rhombencephalic neural crest segmentation is preserved throughout craniofacial ontogeny. *Development* **122**, 3229-3242 (1996)
13. Huang R. *et al.* Contribution of single somites to the skeleton and muscles of the occipital and cervical regions in avian embryos. *Anat. Embryol.* 202, 375-383 (2000)
14. Huang, L.F. *et al.* Mouse clavicular development: analysis of wild-type and cleidocranial dysplasia mutant mice. *Dev Dyn.* **210**, 33-40 (1997)
15. Hall, B.K. Development of the clavicles in birds and mammals. *J. Exp. Zool.* **289**, 153-161 (2001)
16. Danielian, P. S., Muccino, D., Rowitch, D. H., Michael, S. K. and McMahon, A. P. Modification of gene activity in mouse embryos in utero by a tamoxifen-inducible form of Cre recombinase. *Curr. Biol.* **8**, 1323-1326 (1998).
17. Ferguson C.A. & Graham, A. Redefining the head-trunk interface for the neural crest. *Dev. Biol.* **269**, 70-80 (2004).
18. Soriano, P. Generalized lacZ expression with the ROSA26 Cre reporter strain. *Nature Genet* **21**: 70–71(1999)
19. Mao, X. *et al.* Activation of EGFP expression by Cre-mediated excision in a new ROSA26 reporter mouse strain. *Blood* **97**, 324-326 (2001)
20. Condie, B. G. & Capecchi, M. R.. Mice with targeted disruptions in the paralogous genes *Hoxa-3* and *Hoxd-3* reveal synergistic interactions. *Nature* **370**, 304-307 (1994).
21. Burke, A.C., Nelson, C.E., Morgan, B.A. and Tabin, C. *Hox* genes and the evolution of vertebrate axial morphology, *Development* **121**, 333-346 (1995)
22. Zhang, F. *et al.* Elements both 5' and 3' to the murine *Hoxd4* gene establish anterior borders of expression in mesoderm and neuroectoderm. *Mech. Dev.* **67**, 49-58 (1997).
23. Loonstra A *et al.* .Growth inhibition and DNA damage induced by Cre recombinase in mammalian cells. *Proc Natl Acad Sci U S A*. Jul 31;98(16):9209-14 (2001).
24. Motta, P.J. & Wilga, C.D. Advances in the study of feeding behaviours, mechanisms, and mechanics of sharks. in *Environmental Biology of Fishes.* **60**, 131-156 (Kluwer Academic Publishers, Netherlands, 2001).
25. Marinelli, W. & Strenger, A. *Vergleichende Anatomie und Morphologie der Wirbeltiere. I. Lampetra fluviatilis.* Verlag Franz Deuticke, Vienna (1934)
26. Clarke RA, Catalan G, Diwan AD, Kearsley JH. Heterogeneity in Klippel-Feil syndrome: a new classification. *Pediatr Radiol.* 1998 Dec;28(12):967-74.
27. Horwitz AE, 1908. Congenital elevatnio of the scapula – Sprengel’s deformity. *Am J Orthop Surg* 6: 260-311.
28. Otto F *et al* (1997) *Cbfa1*, a candidate gene for cleidocranial dysplasia syndrome, is essential for osteoblast differentiation and bone development. *Cell* 89:765–771
29. *Greenfield’s Neuropathology*, 7th edition, D.I. Graham & Lantos, P.L. (Oxford University Press 2002)
30. Kjaer I, Niebuhr E: Studies of the cranial base in 23 patients with cri-du-chat syndrome suggest a cranial developmental field involved in the condition. *Am J Med Genet* 1999 Jan 1; 82(1): 6-14
31. Olsson *et al.* Cranial neural crest cells contribute to connective tissue in cranial muscles in the anuran amphibian, *Bombina orientalis*. *Dev Biol.* 2001 Sep 15;237(2):354-67 (2001)
32. Huang, R. , Zhi, Q., Patel K., Wilting J. & Christ B.. Dual origin and segmental organisation of the avian scapula. *Development* **127**:3789–3794 (2000).

33. Alvarez, L.E. *et al.* Intrinsic, Hox-dependant cues determine the fate of skeletal muscle precursors, *Devel. Cell* **5**, 379-390 (2003).
34. Baylies M.K., *et al.* Myogenesis: a view from Drosophila. *Cell* **93**, 921-7 (1998).
35. Barrow, J.R. & Capecchi M.R. Compensatory defects associated with mutations in *Hoxa1* restore normal palatogenesis to *Hoxa2* mutants. *Development*, **126**. 5011-26 (1999)
36. Smith A. *et al.* The EphA4 and EphB1 receptor tyrosine kinases and ephrin-B2 ligand regulate targeted migration of branchial neural crest cells. *Curr Biol.* Aug 1;7(8):561-70 (1997).
37. Selleri L *et al.* Requirement for Pbx1 in skeletal patterning and programming chondrocyte proliferation and differentiation. *Development.* Sep;128(18):3543-57 (2001)
38. Dietrich S & Gruss P. undulated phenotypes suggest a role of Pax-1 for the development of vertebral and extravertebral structures. *Dev Biol.* Feb;167(2):529-48 (1995)
39. Peters H. *et al.*, Pax1 and Pax9 synergistically regulate vertebral column development. *Development.* Dec;126 (23):5399-408 (1999)
40. Profs F,*et al.* The role of Emx2 during scapula formation. *Dev Biol.* Nov 15;275(2):315-24 (2004)
41. Jarvik, E. *Basic Structure and Evolution of Vertebrates, vol. 1* (Academic Press, London, 1980)
42. Schoch, R. R. Comparative osteology of *Mastodonsaurus giganteus* (Jaeger, 1828) from the Middle Triassic (Lettenkeuper: Longobardian) of Germany (Baden-Württemberg, Bayern, Thüringen). *Stuttgarter Beiträge zur Naturkunde, Serie B* **278**, 1-175 (1999)
43. Sumida, S. S. in *Amniote Origins* (eds. Sumida, S. S. & Martin, K. L. M.) 353-398 (Academic, San Diego, 1997).
44. Lebedev, O. A. in *The Second Gross Symposium "Advances in Palaeoichthyology"* (ed. Luksevics, E.) 79-98 (*Acta Universitatis Latviensis* **679**, 2005)
45. Clack, J. A. & Finney, S. M. *Pederpes finneyae*, an articulated tetrapod from the Tournaisian of Western Scotland. *J. Syst. Palaeont.* **2**, 311-346 (2005).
46. Kemp, T. S. *Mammal-like Reptiles and the origin of Mammals* (Academic, London, 1982).
47. Reisz, R. R., Berman, D. S. & Scott, D. The anatomy and relationships of the Lower Permian reptile *Araucoscelis*. *J. Vert. Paleontol.* **4**, 57-67 (1984).
48. Jaekel, O. Die Wirbeltierfunde aus dem Keuper von Halberstadt. *Paläont. Zeitschrift* **2**, 88-214 (1915-16)
49. Joyce W. The presence of cleithra in the primitive turtle *Kayentachelys aprix*. *J. Vert. Paleontol.* Suppl. **23(3)**, 66A (2003).
50. Schoch, R. R. Comparative ontogeny of Early Permian branchiosaurid amphibians. *Developmental stages. Palaeontographica A* **222**, 43-83 (1992).
51. Rowitch, D.H. *et al.* Identification of an evolutionarily conserved 110 base-pair cis-acting regulatory sequence that governs Wnt-1 expression in the murine neural plate. *Development* **125**, 2735-2746 (1998).
52. Jiang *et al.* Fate of the mammalian cardiac neural crest. *Development* **127**, 1607-1616 (2000).
53. Soo, K. *et al.* Twist function is required for the morphogenesis of the cephalic neural tube and the differentiation of the cranial neural crest cells in the mouse embryo. *Dev. Biol.* **247**, 251-270 (2002).
54. Lee, E-C. *et al.* A highly efficient Escherichia coli-based chromosome engineering system adapted for recombinogenic targeting and subcloning of BAC DNA. *Genomics.* Apr 1;73(1):56-65(2001).
55. Kaczmarczyk, S.J. & Green, J. . A single vector containing modified cre recombinase and LOX recombination sequences for inducible tissue-specific amplification of gene expression., *Nucleic Acids Res.* **29(12)**:E56-60 (2001).
56. Okabe M, Ikawa M, Kominami K, Nakanishi T, Nishimune Y. 'Green mice' as a source of ubiquitous green cells. *FEBS Lett.* 1997 May 5;407(3):223-9.
57. Chung, J.H., Whiteley M. & Felsenfeld, G., A 5' element of the chicken beta-globin domain serves as an insulator in human erythroid cells and protects against position effect in Drosophila. *Cell.*; **74**, 505-14 (1993).
58. Poepperl H, *et al.* Segmental expression of Hoxb-1 is controlled by a highly conserved autoregulatory loop dependent upon exd/pbx. *Cell.* **81(7)**:1022-42 (1995).
59. Chung J.H., Bel, A.C. & Felsenfeld, G. Characterization of the chicken beta-globin insulator. *Proc Natl Acad Sci U S A.*; **94**, 575-80 (1997).
60. Lufkin, T. *et al.* Homeotic transformation of the occipital bones of the skull by ectopic expression of a homeobox gene. *Nature* **359**, 835-841 (1992).
61. Morrison *et al.* In vitro and transgenic analysis of a human HOXD4 retinoid-responsive enhancer. *Development.* **122(6)**:1895-907 (1996).
62. van der Hoeven, F., Zakany, J. & Duboule, D. Gene transpositions in the HoxD complex reveal a hierarchy of regulatory controls. *Cell.* **85(7)**:1025-35 (1996).
63. Spitz F, Gonzalez F, Peichel C, Vogt TF, Duboule D, Zakany J. Large scale transgenic and cluster deletion analysis of the HoxD complex separate an ancestral regulatory module from evolutionary innovations. *Genes Dev.* Sep 1;15(17):2209-14 (2001).
