# Supplementary material
Source: PubMed Central journal article supplement (PMC1352163)

**Appendix 2: specific post-otic neural crest (PONC) deficiencies in mouse mutants of :**

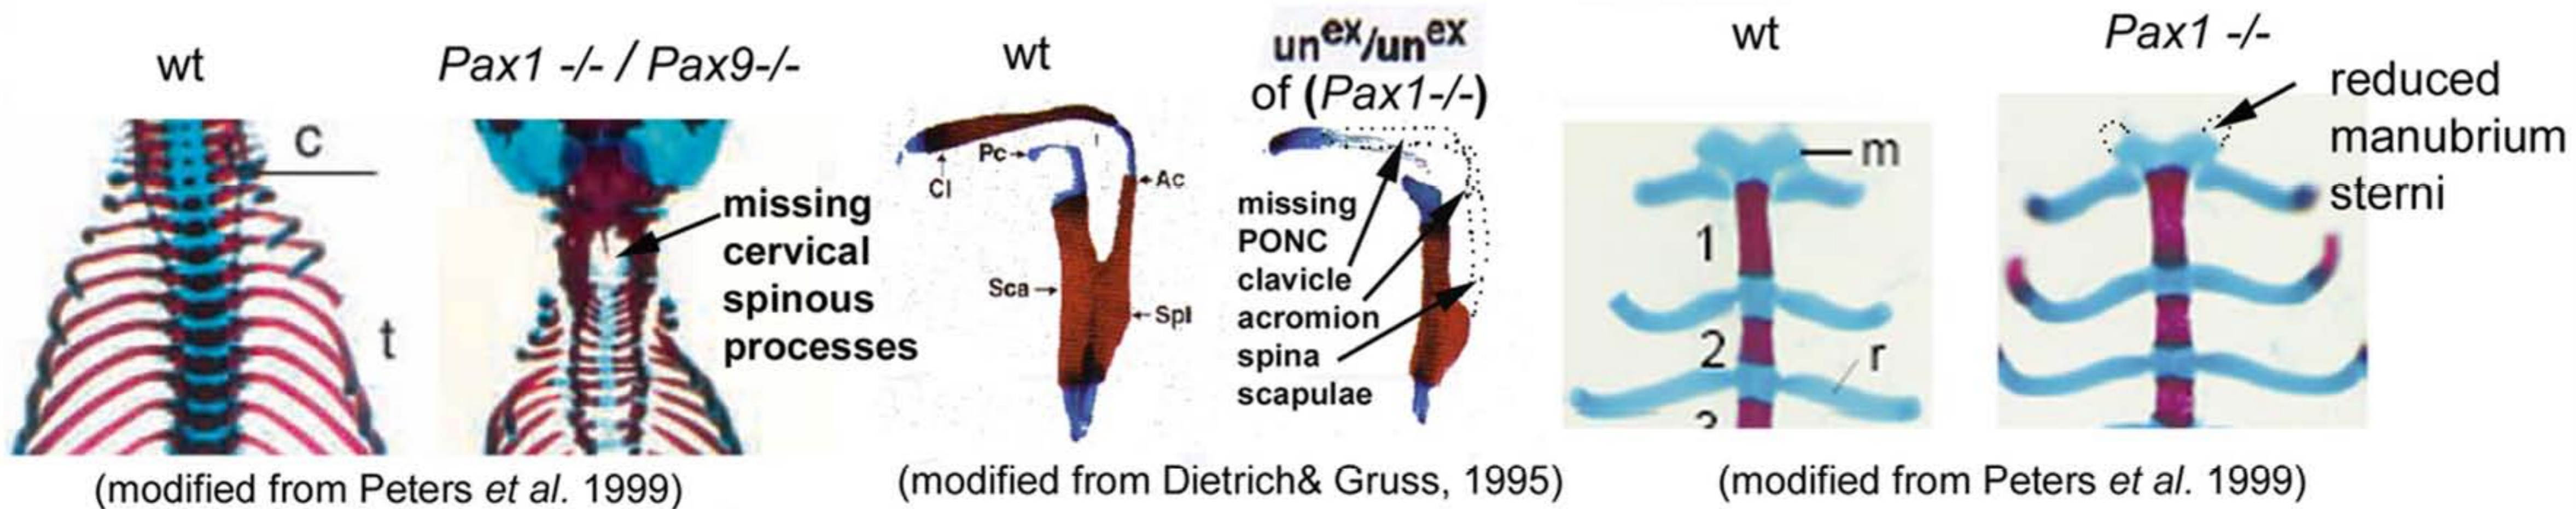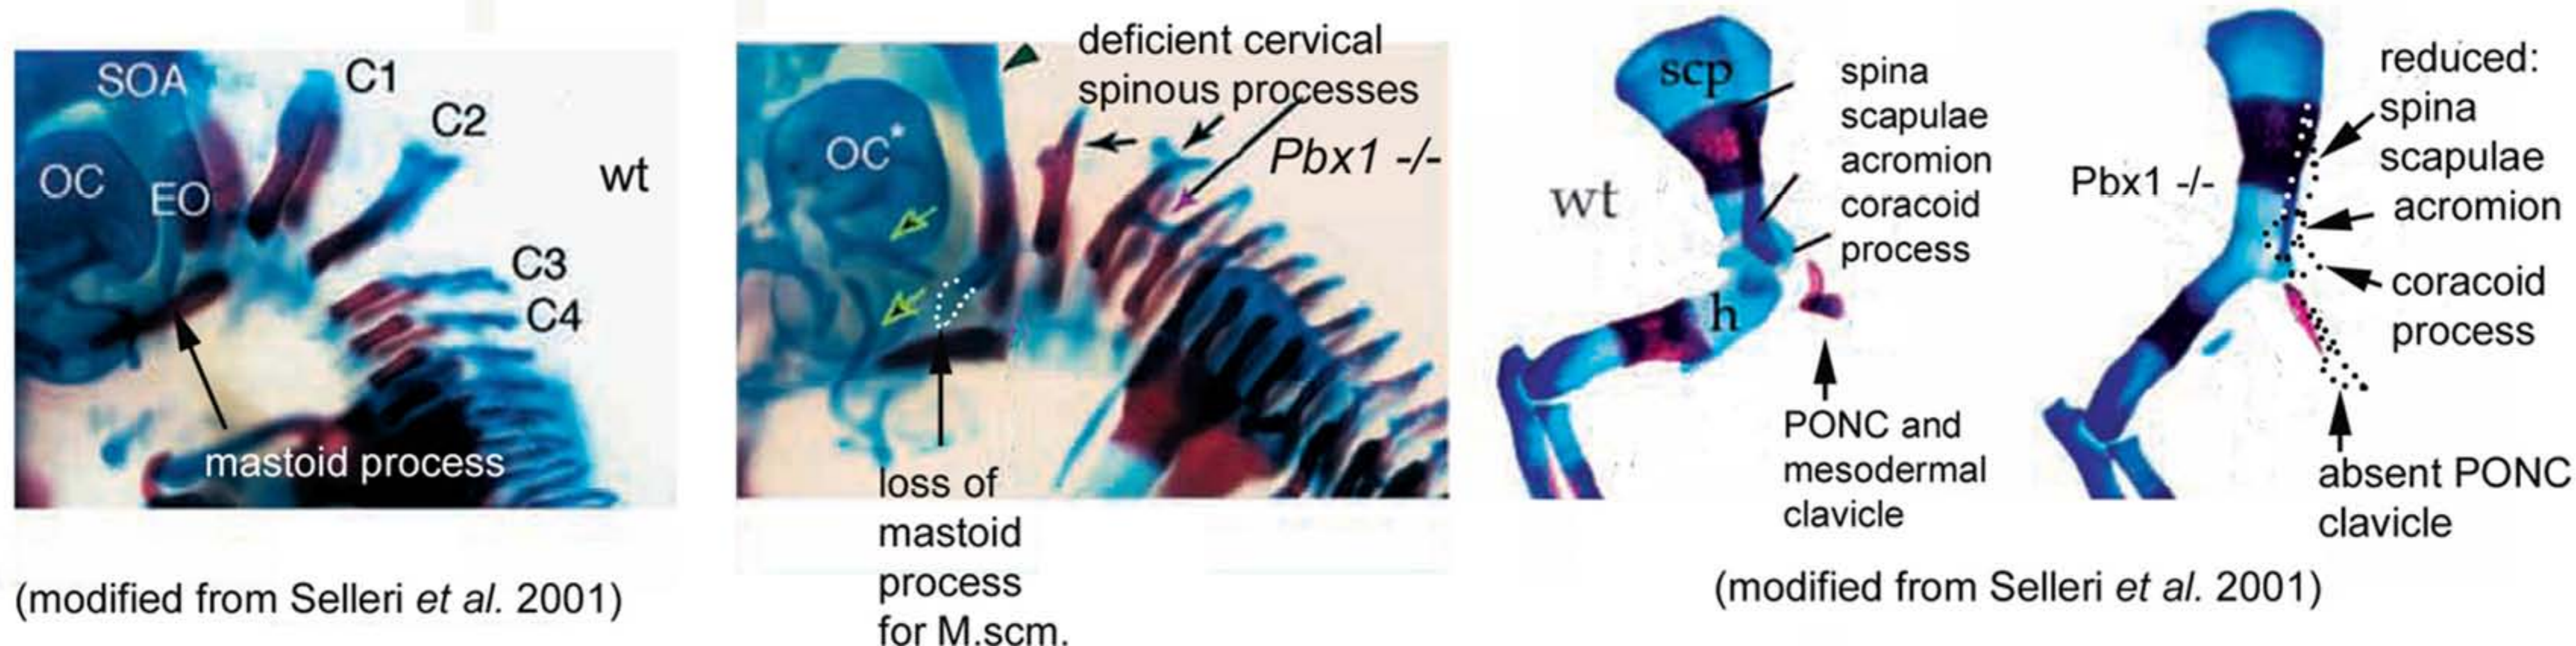

Supplement: NIHMS4257-supplement-Supp_fig_1.pdf [file NIHMS4257-supplement-Supp_fig_1.pdf]
